# Supplementary material
Source: Copernicus journal article supplement (doi:10.5194/essd-18-3757-2026)
Supplement: Supplementary file 1 [file essd-18-3757-2026-supplement.pdf]

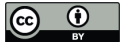

*Supplement of*

## **Global monthly ocean dissolved oxygen (1960–2023) reconstructed to 5902 m with BLENDR, a Bayesian-optimized ensemble learning framework**

**Mingyu Han et al.**

*Correspondence to:* Yuntao Zhou (ytzhou@sjtu.edu.cn)

The copyright of individual parts of the supplement might differ from the article licence.

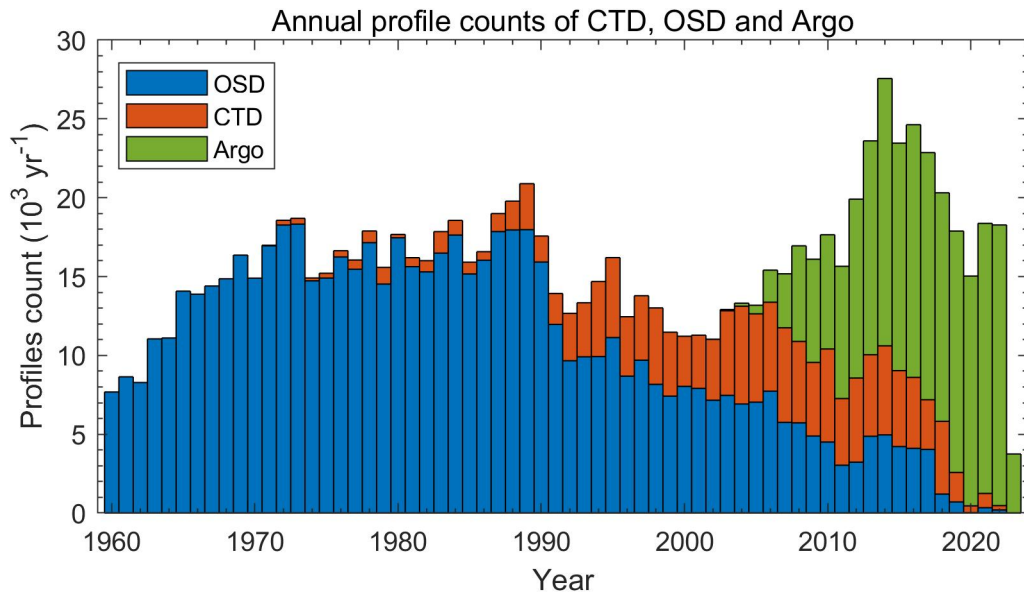

**Figure S1. Annual profile counts of OSD (blue), CTD (orange), and Argo (green) observations used in this study.** Bars show the number of dissolved oxygen profiles (in  $10^3 \text{ profiles yr}^{-1}$ ) from each dataset, highlighting the dominance of ship-based OSD/CTD measurements before the 2000s and the rapid increase in Argo float profiles in recent years.

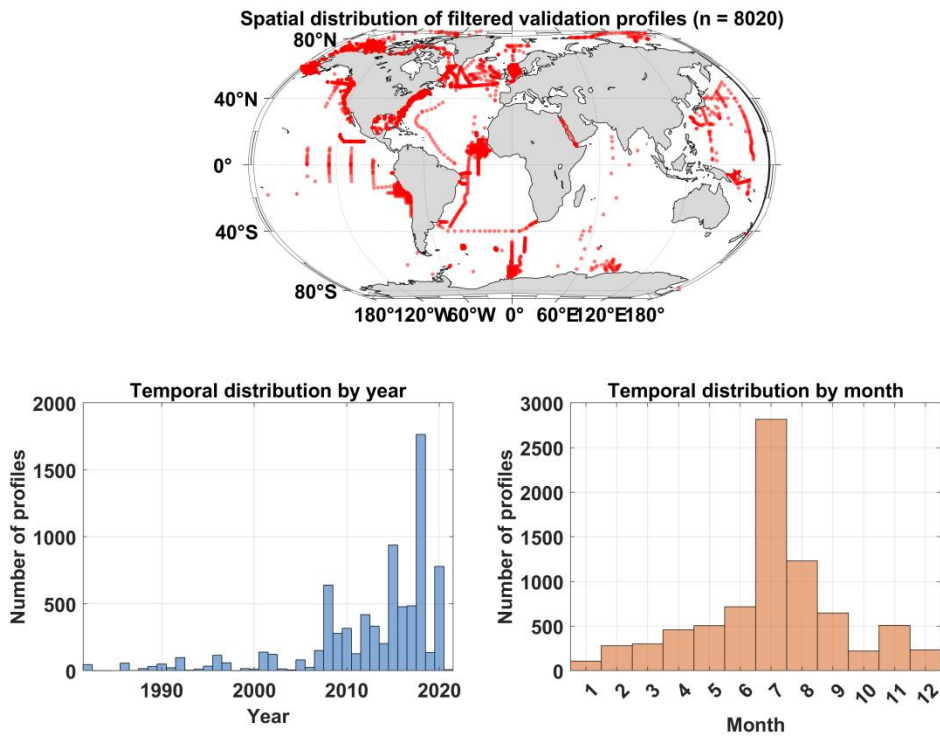

**Figure S2. Spatial and temporal distribution of the filtered GLODAPv2 validation set.** The upper panel shows the locations of the 8,020 unique validation profiles after excluding profiles matched with the CTD and OSD records used in model training. The lower panels show the temporal distribution of these profiles by year and by month.

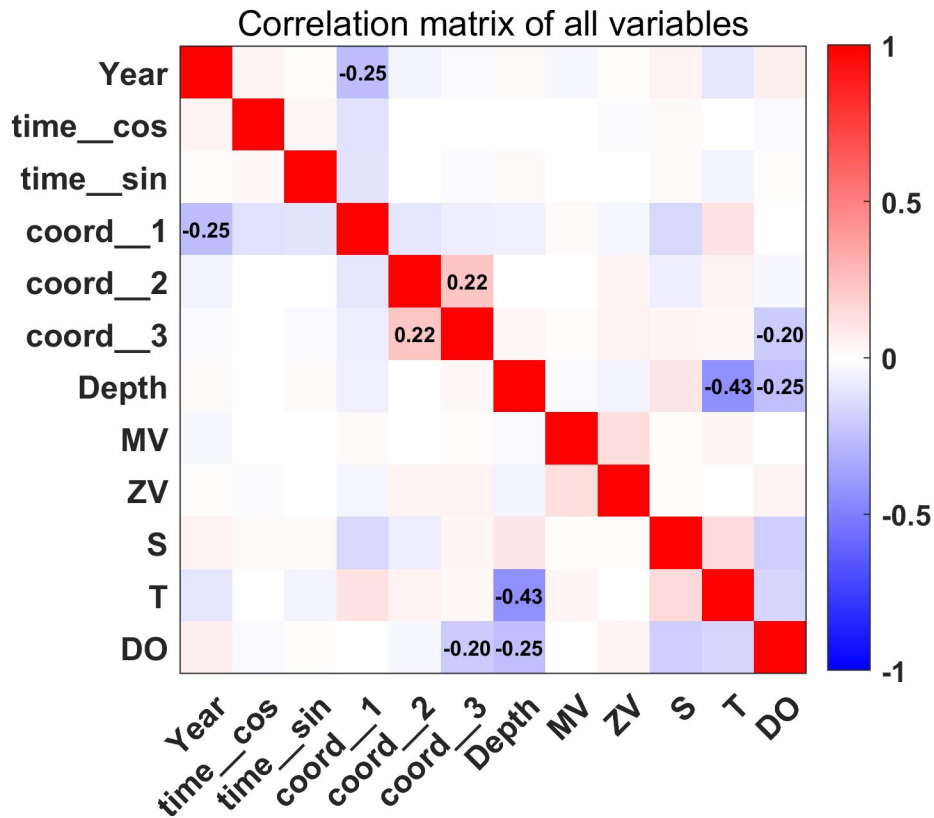

**Figure S3. Correlation matrix of all predictor variables and dissolved oxygen (DO).** Colors indicate Pearson correlation coefficients (red: positive, blue: negative, white: near zero), with the diagonal showing self-correlations. Numerical values are overlaid only for coefficients with absolute values greater than 0.2.

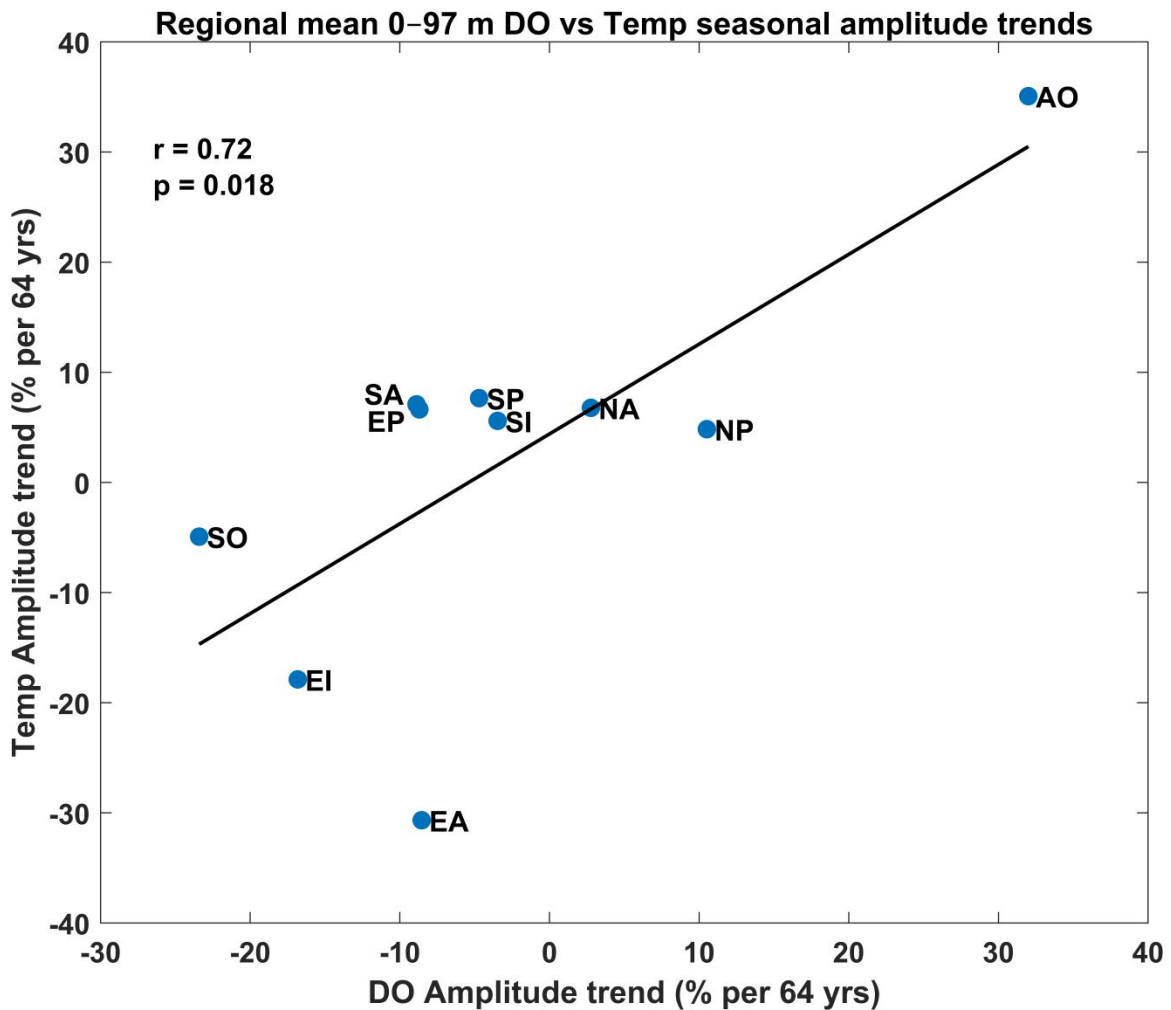

**Figure S4. Relationship between regional trends in the seasonal amplitude of DO and temperature in the upper 0 – 97 m.** Each point shows the basin - mean trend in DO seasonal amplitude (x axis) and temperature seasonal amplitude (y axis), expressed as percent change over 1960 – 2023, for the ten regions defined in Figure 6a of the main text (AO, NA, NP, EA, EI, EP, SA, SP, SI, SO). The solid line denotes the least-squares linear fit across basins, with correlation coefficient  $r = 0.72$  and  $p = 0.018$ .

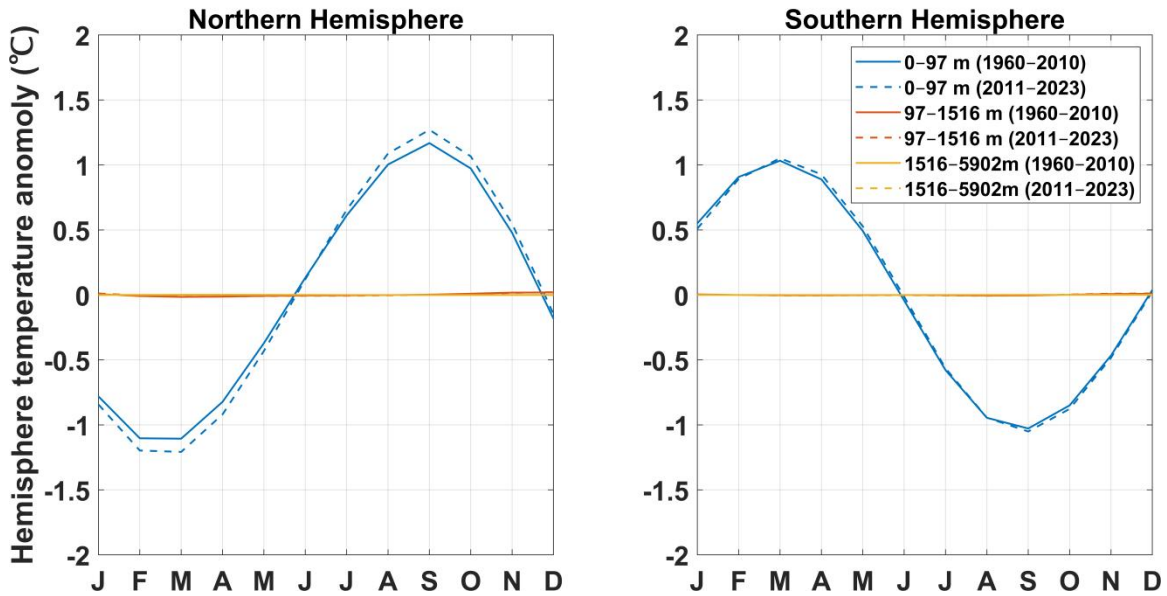

**Figure S5. Climatological seasonal cycle of hemispheric mean temperature anomalies.** The left panel shows the Northern Hemisphere and the right panel shows the Southern Hemisphere. The blue lines denote the surface layer (0 – 97 m), the red lines denote the thermocline and intermediate layer (97 – 1516 m), and the yellow lines denote the deep ocean (1516 – 5902 m). The solid lines represent anomalies from 1960 to 2010, and the dashed lines represent anomalies from 2011 to 2023.

**Table S1. Number of available dissolved oxygen profiles below 2,000 m for each basin**

| Region              | 2000-3000m | 3000-4000m | 4000-5000m | 5000-5902m |
|---------------------|------------|------------|------------|------------|
| North Pacific       | 22867      | 10469      | 7230       | 3352       |
| Equatorial Pacific  | 5988       | 3443       | 2307       | 809        |
| South Pacific       | 5349       | 3357       | 2117       | 669        |
| Arctic Ocean        | 8673       | 2555       | 58         | 3          |
| North Atlantic      | 34629      | 12012      | 5678       | 1722       |
| Equatorial Atlantic | 4179       | 2953       | 2000       | 533        |
| South Atlantic      | 4192       | 3380       | 2054       | 674        |
| Southern Ocean      | 10098      | 6172       | 3262       | 545        |
| North Indian Ocean  | 3664       | 2053       | 1351       | 340        |
| South Indian Ocean  | 5148       | 2981       | 2043       | 648        |

**Table S2. Vertical levels of the 75-layer depth used in this study.**

| Level | Depth (m) | Level | Depth (m) | Level | Depth (m) |
|-------|-----------|-------|-----------|-------|-----------|
| 1     | 0.51      | 26    | 120.00    | 51    | 1516.36   |
| 2     | 1.56      | 27    | 133.08    | 52    | 1652.57   |
| 3     | 2.67      | 28    | 147.41    | 53    | 1795.67   |
| 4     | 3.86      | 29    | 163.16    | 54    | 1945.30   |
| 5     | 5.14      | 30    | 180.55    | 55    | 2101.03   |
| 6     | 6.54      | 31    | 199.79    | 56    | 2262.42   |
| 7     | 8.09      | 32    | 221.14    | 57    | 2429.03   |
| 8     | 9.82      | 33    | 244.89    | 58    | 2600.38   |
| 9     | 11.77     | 34    | 271.36    | 59    | 2776.04   |
| 10    | 13.99     | 35    | 300.89    | 60    | 2955.57   |
| 11    | 16.53     | 36    | 333.86    | 61    | 3138.56   |
| 12    | 19.43     | 37    | 370.69    | 62    | 3324.64   |
| 13    | 22.76     | 38    | 411.79    | 63    | 3513.45   |
| 14    | 26.56     | 39    | 457.63    | 64    | 3704.66   |
| 15    | 30.87     | 40    | 508.64    | 65    | 3897.98   |
| 16    | 35.74     | 41    | 565.29    | 66    | 4093.16   |
| 17    | 41.18     | 42    | 628.03    | 67    | 4289.95   |
| 18    | 47.21     | 43    | 697.26    | 68    | 4488.15   |
| 19    | 53.85     | 44    | 773.37    | 69    | 4687.58   |
| 20    | 61.11     | 45    | 856.68    | 70    | 4888.07   |
| 21    | 69.02     | 46    | 947.45    | 71    | 5089.48   |
| 22    | 77.61     | 47    | 1045.85   | 72    | 5291.68   |
| 23    | 86.93     | 48    | 1151.99   | 73    | 5494.58   |
| 24    | 97.04     | 49    | 1265.86   | 74    | 5698.06   |
| 25    | 108.03    | 50    | 1387.38   | 75    | 5902.06   |

**Table S3. Cross-validation  $\Delta$  DO ( $\mu\text{mol kg}^{-1}$ )**

| Model    | Fold 1 | Fold 2 | Fold 3 | Fold 4 | Fold 5 | Fold 6 | Fold 7 | Fold 8 |
|----------|--------|--------|--------|--------|--------|--------|--------|--------|
| RF       | -0.191 | 0.222  | -0.090 | 0.139  | 0.075  | 0.139  | 0.420  | 0.331  |
| XGBoost  | -0.605 | 0.177  | -0.244 | -0.001 | -0.111 | 0.036  | 0.344  | 0.092  |
| LightGBM | -0.525 | 0.353  | -0.090 | 0.199  | 0.039  | 0.179  | 0.313  | 0.232  |
| Hist_GBT | -0.262 | 0.203  | -0.130 | 0.185  | 0.035  | 0.184  | 0.425  | 0.206  |
| ERT      | -0.331 | -0.165 | -0.355 | -0.063 | -0.118 | 0.002  | 0.634  | 0.199  |
| CatBoost | -0.381 | 0.160  | -0.122 | 0.101  | 0.059  | 0.153  | 0.379  | 0.265  |

**Table S4. Cross-validation MAE ( $\mu\text{mol kg}^{-1}$ )**

| Model    | Fold 1 | Fold 2 | Fold 3 | Fold 4 | Fold 5 | Fold 6 | Fold 7 | Fold 8 |
|----------|--------|--------|--------|--------|--------|--------|--------|--------|
| RF       | 10.381 | 9.882  | 9.781  | 9.607  | 9.513  | 9.434  | 9.378  | 9.753  |
| XGBoost  | 11.750 | 11.313 | 11.256 | 11.089 | 10.787 | 10.787 | 10.863 | 11.158 |
| LightGBM | 11.035 | 10.543 | 10.482 | 10.300 | 10.170 | 10.107 | 10.161 | 10.371 |
| Hist_GBT | 11.422 | 11.014 | 10.875 | 10.686 | 10.626 | 10.544 | 10.532 | 10.827 |
| ERT      | 11.123 | 10.686 | 10.422 | 10.317 | 10.199 | 10.143 | 10.143 | 10.448 |
| CatBoost | 11.036 | 10.586 | 10.452 | 10.288 | 10.208 | 10.097 | 10.086 | 10.383 |

**Table S5. Cross-validation RMSE ( $\mu\text{mol kg}^{-1}$ )**

| Model    | Fold 1 | Fold 2 | Fold 3 | Fold 4 | Fold 5 | Fold 6 | Fold 7 | Fold 8 |
|----------|--------|--------|--------|--------|--------|--------|--------|--------|
| RF       | 17.272 | 16.586 | 16.303 | 16.265 | 15.969 | 16.005 | 16.287 | 16.303 |
| XGBoost  | 18.339 | 17.754 | 17.568 | 17.518 | 17.053 | 17.176 | 17.485 | 17.515 |
| LightGBM | 17.590 | 16.899 | 16.766 | 16.716 | 16.402 | 16.357 | 16.691 | 16.645 |
| Hist_GBT | 17.990 | 17.442 | 17.114 | 17.038 | 16.843 | 16.888 | 17.091 | 17.109 |
| ERT      | 17.846 | 17.370 | 16.757 | 16.976 | 16.494 | 16.597 | 16.765 | 16.825 |
| CatBoost | 17.566 | 16.970 | 16.681 | 16.661 | 16.441 | 16.385 | 16.618 | 16.660 |

**Table S6. Cross-validation  $R^2$** 

| Model    | Fold 1 | Fold 2 | Fold 3 | Fold 4 | Fold 5 | Fold 6 | Fold 7 | Fold 8 |
|----------|--------|--------|--------|--------|--------|--------|--------|--------|
| RF       | 0.958  | 0.961  | 0.960  | 0.960  | 0.960  | 0.960  | 0.960  | 0.963  |
| XGBoost  | 0.953  | 0.955  | 0.954  | 0.953  | 0.954  | 0.954  | 0.954  | 0.957  |
| LightGBM | 0.957  | 0.959  | 0.958  | 0.958  | 0.958  | 0.958  | 0.958  | 0.961  |
| Hist_GBT | 0.955  | 0.957  | 0.956  | 0.956  | 0.956  | 0.955  | 0.956  | 0.959  |
| ERT      | 0.955  | 0.957  | 0.958  | 0.956  | 0.957  | 0.957  | 0.958  | 0.961  |
| CatBoost | 0.957  | 0.959  | 0.958  | 0.958  | 0.958  | 0.958  | 0.959  | 0.961  |

**Table S7. Sensitivity of BLENDR performance on the filtered GLODAPv2 validation set to different spatiotemporal exclusion criteria.**

|                            | Remaining profiles | MAE    | RMSE   | R <sup>2</sup> | $\Delta$ DO |
|----------------------------|--------------------|--------|--------|----------------|-------------|
| $\pm 1^\circ$ , same month | 8020               | 10.204 | 18.139 | 0.968          | -0.334      |
| $\pm 5^\circ$ , same year  | 2982               | 9.719  | 18.545 | 0.968          | -0.788      |
